# Supplementary material for: Effect of ozone treatment on the phenylpropanoid biosynthesis of postharvest strawberries
Source: Royal Society of Chemistry journal article supplement (doi:10.1039/c9ra03988k), 2019-01-01
Supplement: c9ra03988k1.pdf [file c9ra03988k1.pdf]

**Supplementary table 1.** Primers of quantitative RT-PCR for the selected genes

| Protein ID        | Primer F (5'-3')        | Primer R (5'-3')       |
|-------------------|-------------------------|------------------------|
| DN40748_c0_g4_i2  | GCCGATTACCAGCTCACTAAG   | GTTGTTCTCGGCCAAGTCCT   |
| DN40748_c0_g4_i1  | GGCCGATTACCAGCTCACTA    | GTTGTTCTCGGCCAAGTCCT   |
| DN33720_c0_g3_i1  | GGAAGGAGGAGTCGAAGATCA   | GCCAAGCAGGATATGGTTGA   |
| DN35956_c0_g1_i4  | AGACGGCCGAGGAGTTGAC     | GCCCGTCAGCGGTAGTATC    |
| DN35956_c0_g1_i1  | GGTGAGGGGGATGGAGATAAC   | GCCCGTCAGCGGTAGTATC    |
| DN40748_c0_g26_i1 | TCCGTCAAGCGTCTCATGAT    | GGTCACGGCAGTGATCTCAG   |
| DN35005_c0_g4_i2  | TGGTGAAGCCTGATGGTGTT    | AATCTCTGGGGCACTGGAAG   |
| DN32105_c0_g1_i3  | GGCGGCGACTCACTTGAC      | CATAGGTGTGGCGACATGGA   |
| DN35005_c0_g5_i3  | TCACTTGACGCTGTGGAAGG    | TTCTCAGGGTCCTTGACTCA   |
| DN38477_c2_g5_i1  | ATGAGCGGAGCAGAGAAGGT    | GTCACGAACTGAAGCCTTGAC  |
| DN37789_c0_g1_i9  | TCTACCTCGATGGCTTGACCT   | GGCCAATGCATGAGAATTGT   |
| DN37915_c0_g1_i2  | CGAACATGACGATGGCTCTT    | GCCTGGAGGAAGCTTGAATC   |
| DN38764_c0_g6_i3  | TCATGAAGTTTCCGTTTCAGCTC | TCTGTTGTGGGAGGTTGATGA  |
| DN37722_c0_g3_i3  | GGCGCGAGATTGTGACCTAC    | AACCCCATCAGCTCGTCACT   |
| DN37722_c0_g2_i2  | ATTGGCGCGAGATTGTGAC     | TCGTCACTGTACTGCGTTGTCA |
| DN40983_c0_g8_i2  | GAGGTCAGCTGCTTGGTCACT   | ACATGAGCCGAGAGTGAAGC   |
| DN37999_c0_g2_i3  | CCGAAGAGGAGCTCGTTAACA   | CACCTTGATGTCTCCGAGTC   |
| DN37999_c0_g1_i1  | GAAGGGCCTCAAGTACCTACC   | ATGCCATGGTTGACAAGGTG   |
| DN37999_c0_g2_i2  | AGGAAGCAGCCGTCGAATG     | CCTTCTGCTCAATGGGAAGAT  |
| DN38544_c0_g9_i1  | ATCGAGCTAGACGACGTCACC   | CTTCAAGGCAAAGCAAATCG   |
| DN38261_c0_g1_i1  | GGCCTCCTCGTCACCTTCT     | AGCGGATGAATCCATCTCCA   |

**Supplemental Table 2** – Differentially expressed proteins of the strawberry proteome after 7 days and 21 days of storage in Blank, 1 ppm, 3 ppm and 5 ppm.

| Protein name | Organism          | Accession number <sup>a</sup> | Mass/pI <sup>b</sup> | Mascot score <sup>c</sup> | Matched peptides number | Sequence coverage (%) | Protein relative abundance day 7 <sup>d</sup> | Protein relative abundance day 21 <sup>d</sup> |
|--------------|-------------------|-------------------------------|----------------------|---------------------------|-------------------------|-----------------------|-----------------------------------------------|------------------------------------------------|
| Q4AE08       | Fragaria ananassa | DN40748_c0_g4_i2              | 24.36/ 8.41          | 1681                      | 13                      | 71.8                  |                                               |                                                |
| Q4AE08       | Fragaria ananassa | DN40748_c0_g4_i1              | 18.853/8.53          | 1830                      | 10                      | 63.5                  |                                               |                                                |
| H6SV47       | Prunus persica    | DN33720_c0_g3_i1              | 23.50/4.92           | 2052                      | 9                       | 56.13                 |                                               |                                                |
| Q4AE12       | Fragaria ananassa | DN35956_c0_g1_i4              | 25.55/5.21           | 1027                      | 14                      | 60.34                 |                                               |                                                |
| Q4AE11       | Fragaria ananassa | DN35956_c0_g1_i1              | 25.39/5.33           | 781                       | 13                      | 55.70                 |                                               |                                                |

|            |                           |                   |             |      |    |       |                                                                                       |                                                                                       |
|------------|---------------------------|-------------------|-------------|------|----|-------|---------------------------------------------------------------------------------------|---------------------------------------------------------------------------------------|
| Q4AE08     | <i>Fragaria ananassa</i>  | DN40748_c0_g26_i1 | 20.76 /5.22 | 828  | 6  | 34.54 |     |     |
| Q5UL14     | <i>Fragaria ananassa</i>  | DN35005_c0_g4_i2  | 27.21/8.21  | 1283 | 16 | 59.59 |    |    |
| A0A0A0PTJ7 | <i>Fragaria ananassa</i>  | DN32105_c0_g1_i3  | 21.55/5.94  | 806  | 8  | 45.83 |    |    |
| A0A0A0PTJ7 | <i>Fragaria ananassa</i>  | DN35005_c0_g5_i3  | 22.91/6.57  | 739  | 6  | 26.70 |    |    |
| A0A0B0N5I9 | <i>Gossypium arboreum</i> | DN38477_c2_g5_i1  | 24.39/8.22  | 67   | 4  | 12.61 |   |   |
| A0A089WWI7 | <i>Betula pendula</i>     | DN37789_c0_g1_i9  | 18.59/4.7   | 965  | 7  | 57.06 |  |  |

|        |                             |                  |            |      |    |       |                                                                                       |                                                                                       |
|--------|-----------------------------|------------------|------------|------|----|-------|---------------------------------------------------------------------------------------|---------------------------------------------------------------------------------------|
| V9I5V0 | <i>Caragana korshinskii</i> | DN37915_c0_g1_i2 | 55.02/8.53 | 96   | 9  | 20.16 |     |     |
| Q66PF3 | <i>Fragaria ananassa</i>    | DN38764_c0_g6_i3 | 47.72/5.5  | 40   | 6  | 13.07 |    |    |
| Q66ME9 | <i>Fragaria ananassa</i>    | DN37722_c0_g3_i3 | 21.85/7.11 | 2003 | 13 | 83.16 |    |    |
| Q66ME9 | <i>Fragaria ananassa</i>    | DN37722_c0_g2_i2 | 23.65/5.15 | 1870 | 15 | 80.77 |    |    |
| Q5UL10 | <i>Fragaria ananassa</i>    | DN40983_c0_g8_i2 | 50.18/6    | 2091 | 15 | 32.83 |   |   |
| J7HBV7 | <i>Fragaria ananassa</i>    | DN37999_c0_g2_i3 | 19.82/4.83 | 917  | 13 | 86.93 |  |  |

|        |                          |                  |            |      |    |       |                                                                                     |                                                                                     |
|--------|--------------------------|------------------|------------|------|----|-------|-------------------------------------------------------------------------------------|-------------------------------------------------------------------------------------|
| Q5UL08 | <i>Fragaria ananassa</i> | DN37999_c0_g1_i1 | 28.33/6.43 | 1057 | 10 | 46.43 | 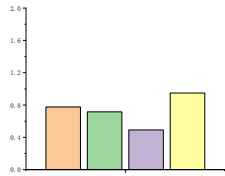  |   |
| Q5UL08 | <i>Fragaria ananassa</i> | DN37999_c0_g2_i2 | 18.53/4.88 | 392  | 12 | 85.98 |  |  |
| W9R8W2 | <i>Morus notabilis</i>   | DN38544_c0_g9_i1 | 58.77/6.55 | 476  | 17 | 40.08 |  |  |
| Q66PF4 | <i>Fragaria ananassa</i> | DN38261_c0_g1_i1 | 61.36/5.3  | 2916 | 26 | 41.26 |  |  |

<sup>a</sup> Accession numbers according to the detected transcriptome of the strawberry transcriptomic database.

<sup>b</sup> Experimental mass (kDa) and isoelectric point (pI) of identified proteins.

<sup>c</sup> Mascot score reported after searching against the detected transcriptome of the strawberry transcriptomic database.

<sup>d</sup> Relative abundances of normalized protein expression; values are expressed as the mean of three replications. Red, green, purple and yellow bars show Blank, 1 ppm, 3 ppm and 5 ppm ozone treatment storage, respectively.
